# Supplementary material for: Copper(ii)-mediated resolution of α-halo carboxylic acids with chiral O,O′-dibenzoyltartaric acid: spontaneous racemization and crystallization-induced dynamic resolution
Source: Royal Society of Chemistry journal article supplement (doi:10.1039/b510170k), 2005-01-01
Supplement: b510170k.pdf [file b510170k.pdf]

# Copper(II)-Mediated Resolution of $\alpha$ -Halo Carboxylic Acids with Chiral *O,O'*-Dibenzoyltartaric Acid: Spontaneous Racemisation and Crystallization-Induced Dynamic Resolution

Hong-wu Xu<sup>ac</sup>, Qi-wei Wang<sup>a</sup>, Jin Zhu<sup>ac</sup>, Jin-gen Deng<sup>\*ac</sup>, Lin-feng Cun<sup>a</sup>, Xin Cui<sup>a</sup>, Jun Wu<sup>a</sup>,  
Xin-liang Xu<sup>b</sup>, Yu-liang Wu<sup>b</sup>

<sup>a</sup> Key Laboratory of Asymmetric Synthesis & Chirotechnology of Sichuan Province and Union Laboratory of Asymmetric Synthesis, Chengdu Institute of Organic Chemistry, Chinese Academy of Sciences, Chengdu 610041, China. E-mail: jgdeng@cioc.ac.cn.

<sup>b</sup> Zhejiang APELOA Medical Technology Co. Ltd., Dongyang 322118, China.

<sup>c</sup> Graduate School of the Chinese Academy of Sciences, Beijing 100039, China.

## 1. Resolution of HL<sup>1</sup> in EtOH/H<sub>2</sub>O

**Syntheses of Cu<sub>2</sub>(L<sup>0</sup>)(L<sup>1</sup>)(OAc)(H<sub>2</sub>O)<sub>2</sub> (Complex 10):** To a solution of *D*-DBTA·H<sub>2</sub>O (760 mg, 0.2 mmol) and racemic  $\alpha$ -bromo-2-chlorophenylacetic acid (1.0 g, 0.2 mmol) in 5 mL of EtOH/H<sub>2</sub>O (3:1) was added Cu(OAc)<sub>2</sub>·H<sub>2</sub>O (800 mg, 0.4 mmol). After stirred for 12 hours, the mixture was cooled to -10°C overnight. The resulted green precipitate was filtered, washed with 10 mL of EtOH and air-dried at room temperature. Yield: 21.3% (based on the racemic acid). Anal. (C<sub>28</sub>H<sub>24</sub>O<sub>14</sub>ClBrCu<sub>2</sub>) C, H, N, Cu: calcd, 40.67%, 2.93%, 0, 15.4%; found, 40.54%, 3.03%, 0, 15.2%. IR absorption bands (cm<sup>-1</sup>): 3455 (br), 3063 (w), 1716 (s), 1651 (vs), 1602 (vs), 1400 (s), 1267 (s), 1177 (w), 1114 (m), 1070 (w), 1026 (w), 741 (m), 711 (m). UV-Vis of the solid sample ( $\lambda$ /nm): 365, 690.

Optically active (*S*)- $\alpha$ -bromo-2-chlorophenylacetic acid was obtained after decomposition of the complex. Yield: 20.2% (based on the racemic acid). Ee: 25.7 %; <sup>1</sup>H NMR (300 MHz, CDCl<sub>3</sub>),  $\delta$ : 10.43 (br, 1H, COOH), 7.05-7.70 (m, 4H, Ar-H), 5.74 (s, 1H, CH) ppm.

## 2. Determination of enantiomeric excess of the acids.

**2.1** Enantiomeric excess of HL<sup>1</sup> to HL<sup>5</sup> were determined by HPLC analysis on chiral column (Chiralcel AS), heptane-2-propanol-trifluoroacetic acid (90:10:0.1), flow rate: 1.0 mL/min.

Retention times for HL<sup>1</sup>: 6.0 and 7.3 min.

Retention times for HL<sup>2</sup>: 6.0 and 6.9 min.

Retention times for HL<sup>3</sup>: 6.2 and 7.5 min.

Retention times for HL<sup>4</sup>: 5.8 and 7.3 min.

Retention times for HL<sup>5</sup>: 6.1 and 7.0 min.

**2.2** The enantiomeric excess of HL<sup>6</sup> and HL<sup>7</sup> were determined by GC analysis on chiral column (Chiralcel Dex 225 column, 155°C, 12 psi) after conversion to the corresponding ethyl esters.

Retention times for  $\alpha$ -bromophenylacetic acid ethyl ester: 5.90 and 6.17 min.

Retention times for  $\alpha$ -Bromo-4-chlorophenylacetic acid ethyl ester: 8.57 and 9.17 min.

**2.3** The enantiomeric excess HL<sup>8</sup> and HL<sup>9</sup> were also determined by GC analysis on chiral column

(Chiralcel Dex column, 100°C, 10 psi) after conversion to the corresponding ethyl esters.

Retention times for 2-bromopropionic acid ethyl ester: 1.84 and 1.91 min.

Retention times for 2-chloropropionic acid ethyl ester: 1.80 and 1.86 min.

### 3. Determination of the reaction time

To a solution of *D*-DBTA·H<sub>2</sub>O (760 mg, 0.2 mmol) and racemic  $\alpha$ -bromo-2-chlorophenylacetic acid (HL<sup>1</sup>, 1.0 g, 0.4 mmol) in 10 mL of acetonitrile at 40°C was added Cu(OAc)<sub>2</sub>·H<sub>2</sub>O (800 mg, 0.4 mmol). After stirred for about five minutes, Cu(OAc)<sub>2</sub> was dissolved and the mixture became clear. Two days later, green precipitate formed. The diastereomic excess of the complex was monitored and determined based on HL<sup>1</sup> obtained after decomposition of the complex. The results showed the best enantioselectivity was obtained when the reaction time was 7 days (Fig. 1).

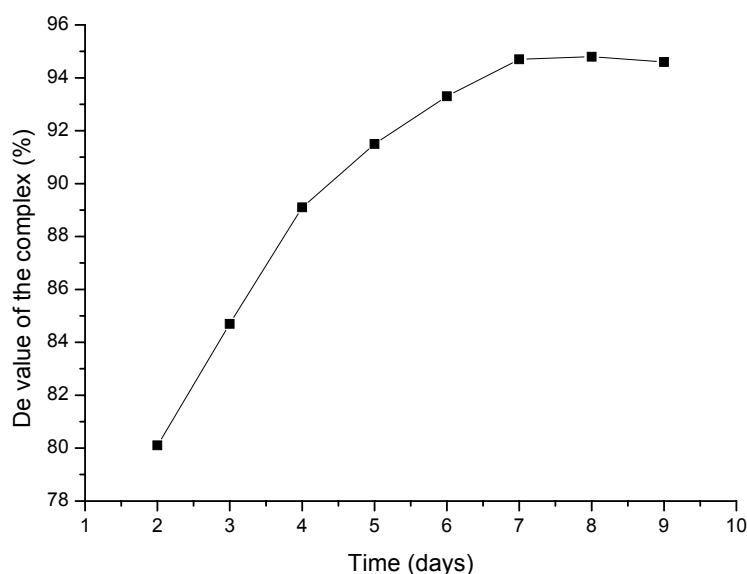

**Fig. 1**

#### 4. The IR spectra

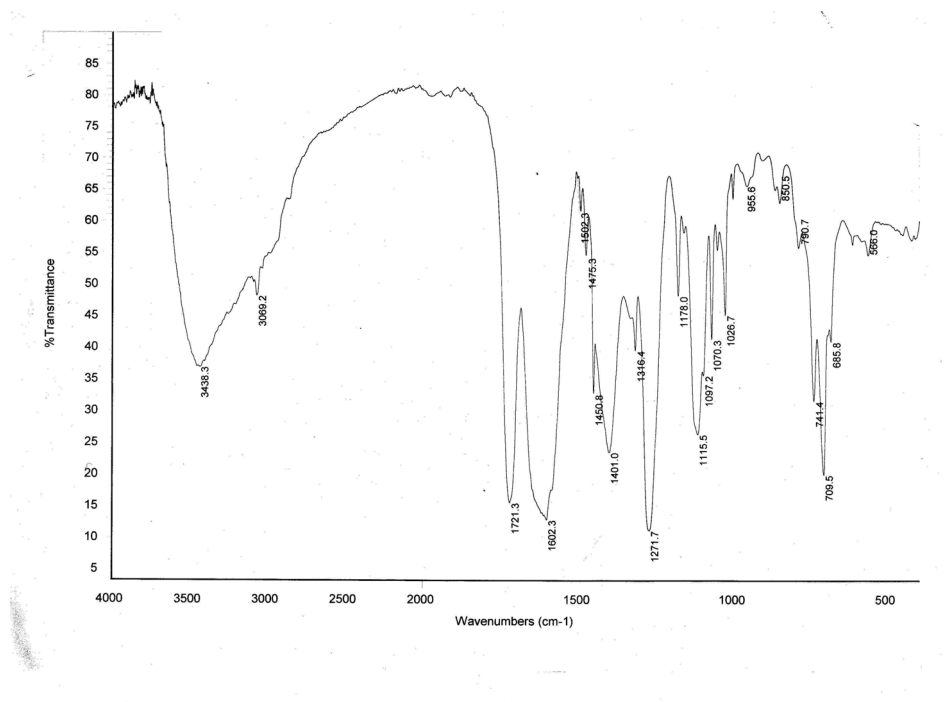

**Fig. The IR spectrum of  $[\text{Cu}_2(\text{L}^0)(\text{L}^1)(\text{OAc})(\text{H}_2\text{O})_2] \cdot 1.5\text{MeCN}$  (Complex 1).**

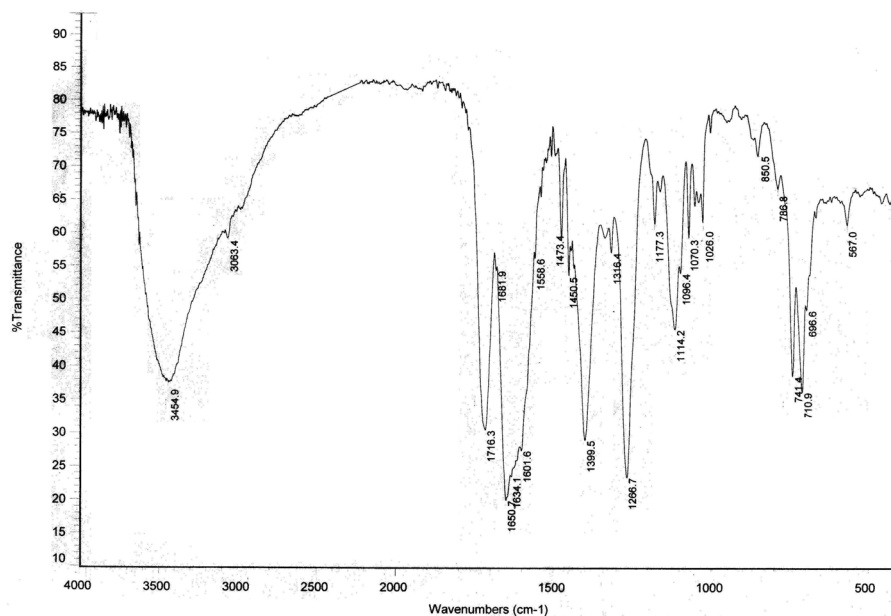

**Fig. The IR spectrum of  $\text{Cu}_2(\text{L}^0)(\text{L}^1)(\text{OAc})(\text{H}_2\text{O})_2$  (Complex 10).**

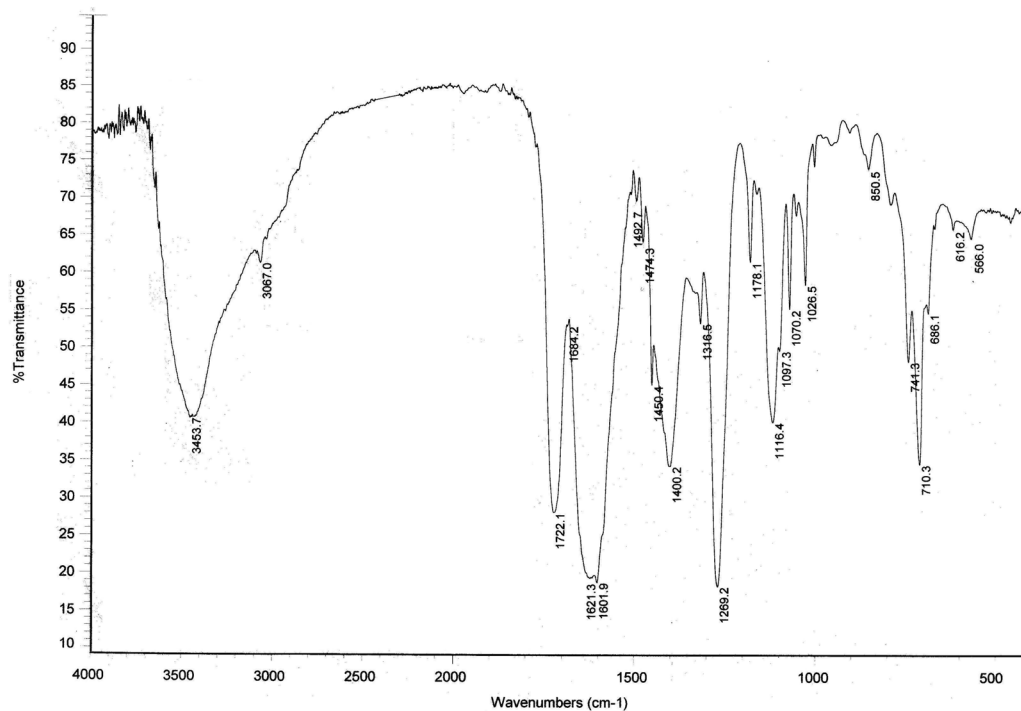

**Fig. The IR spectrum of the solid complex 1 (dried in vacuum for five hours at 50°C).**

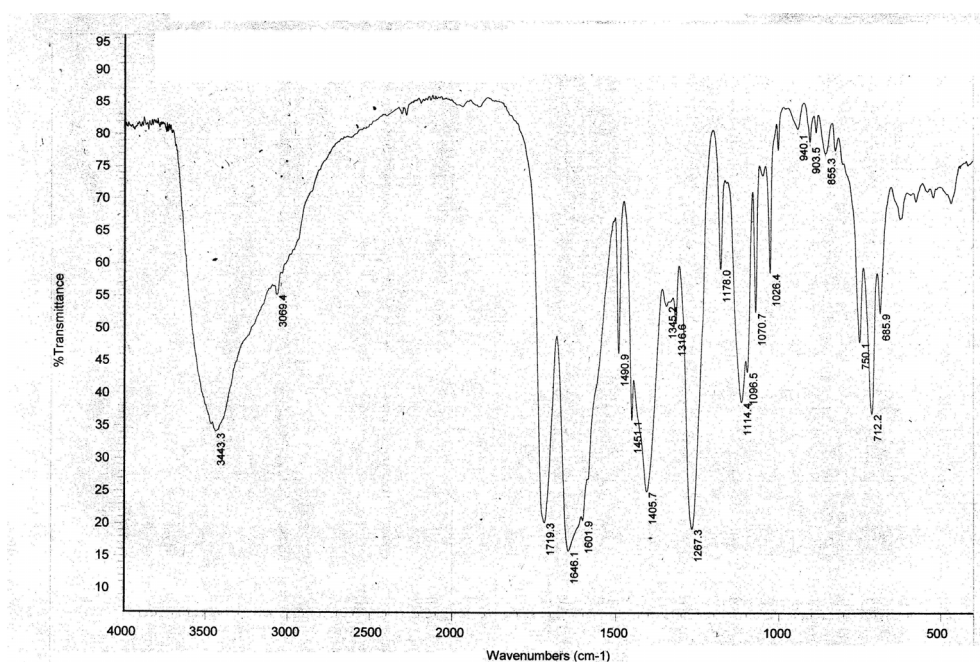

**Fig. The IR spectrum of  $[\text{Cu}_2(\text{L}^0)(\text{L}^2)(\text{OAc})(\text{H}_2\text{O})_2] \cdot 1.5\text{MeCN}$  (Complex 2).**

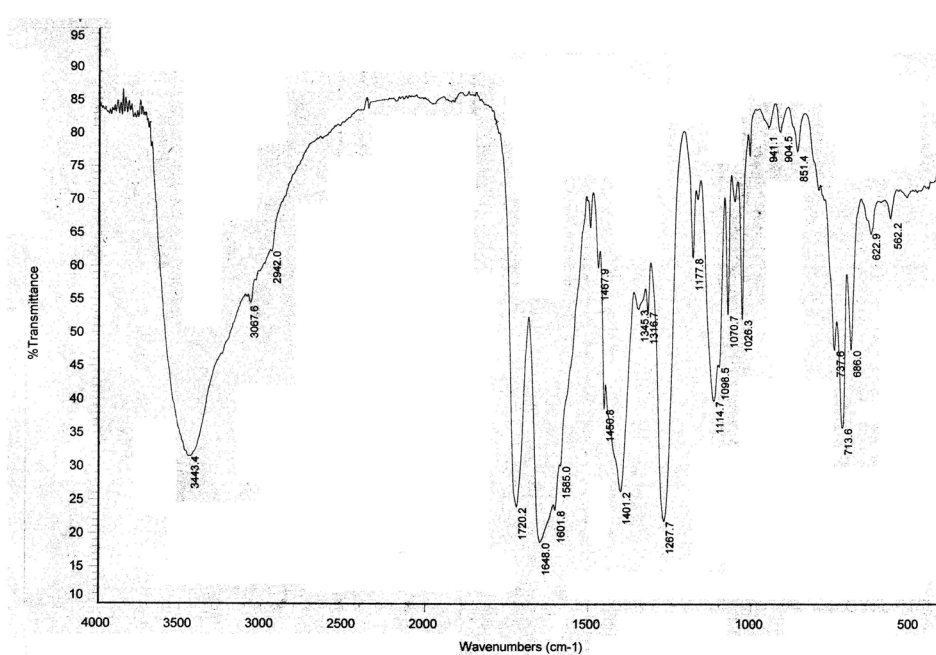

**Fig. The IR spectrum of  $[\text{Cu}_2(\text{L}^0)(\text{L}^3)(\text{OAc})(\text{H}_2\text{O})_2] \cdot 2\text{MeCN}$  (Complex 3).**

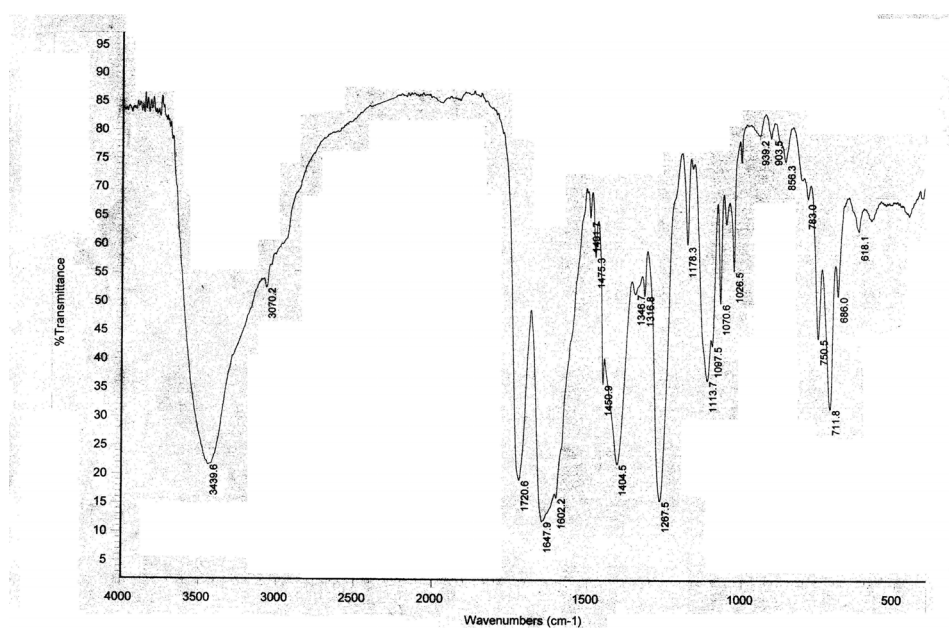

**Fig. The IR spectrum of  $[\text{Cu}_2(\text{L}^0)(\text{L}^4)(\text{OAc})(\text{H}_2\text{O})_2] \cdot 1.5\text{MeCN}$  (Complex 4).**

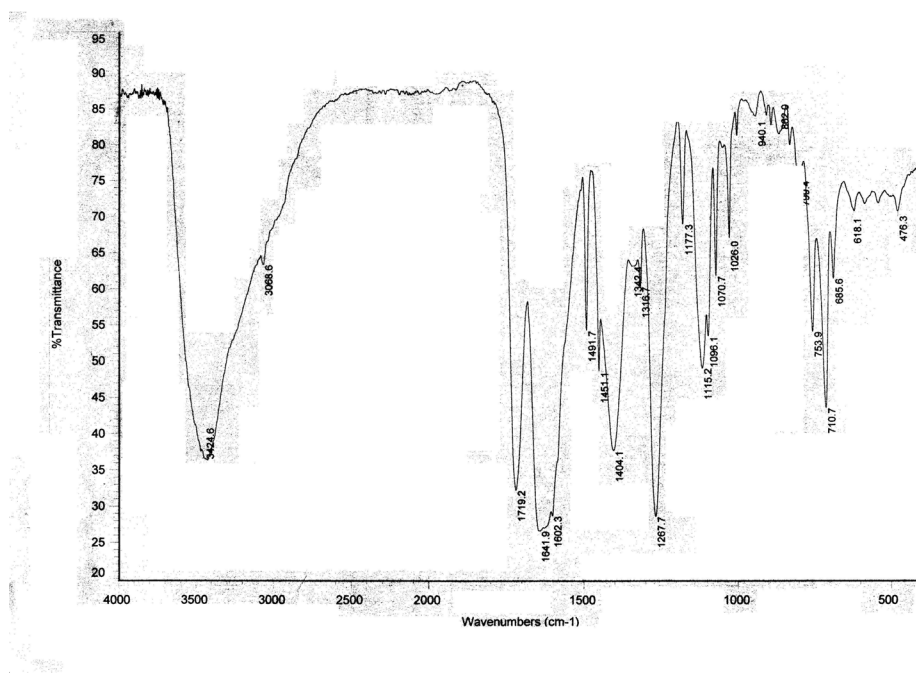

Fig. The IR spectrum of  $[\text{Cu}_2(\text{L}^0)(\text{L}^5)(\text{OAc})(\text{H}_2\text{O})_2] \cdot 1.5\text{MeCN}$  (Complex 5).

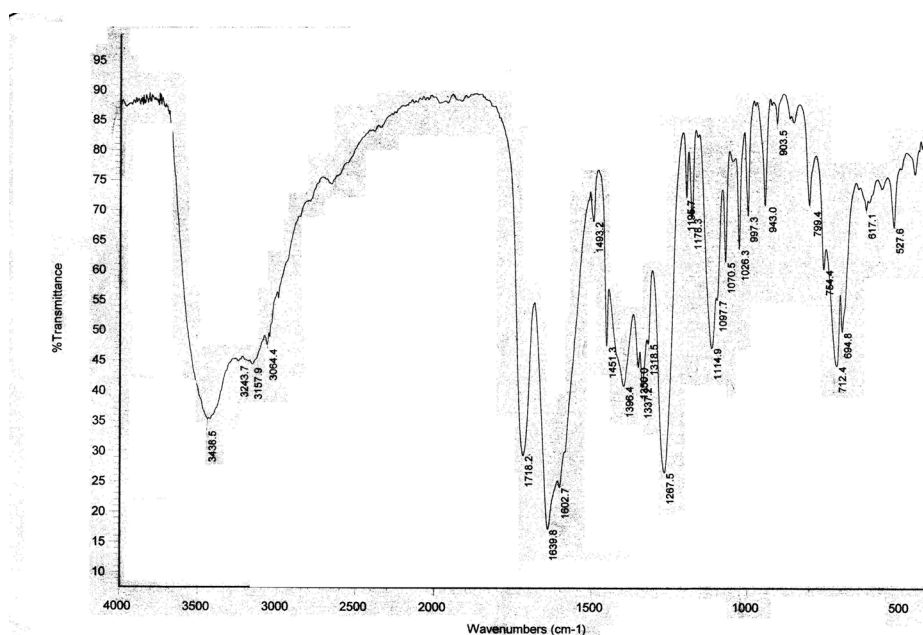

Fig. The IR spectrum of  $\text{Cu}(\text{HL}^0)(\text{L}^6)(\text{H}_2\text{O})_{1.5}$  (Complex 6).

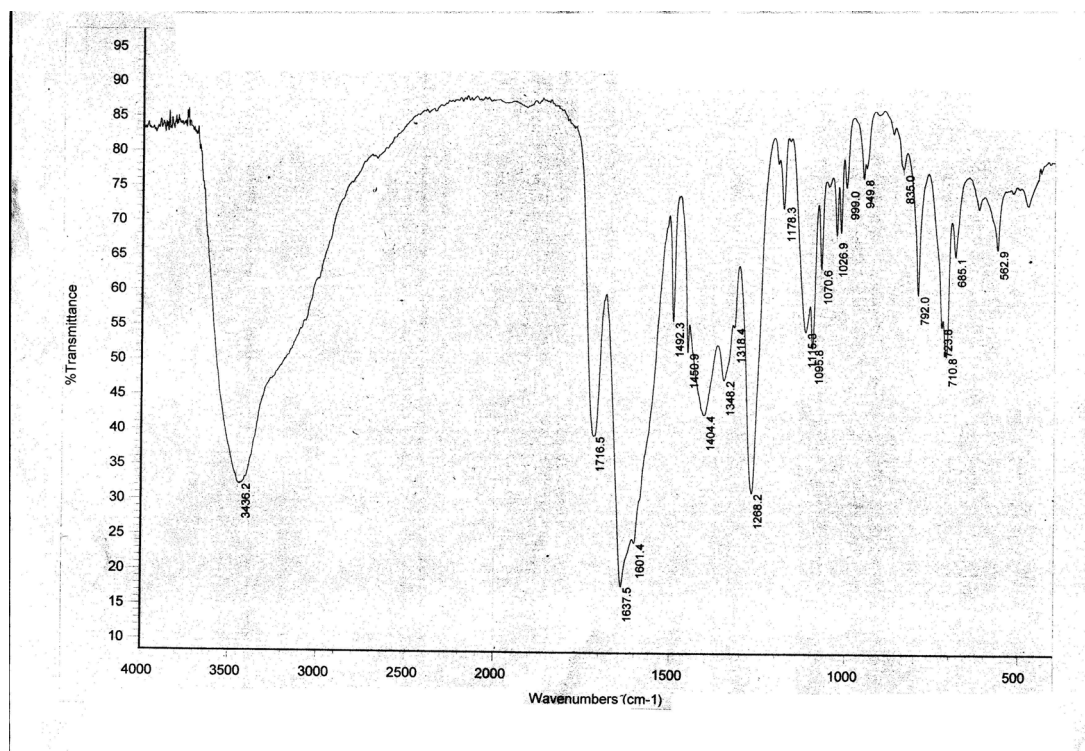

Fig. The IR spectrum of  $\text{Cu}_2(\text{L}^0)(\text{L}^7)(\text{OAc})(\text{H}_2\text{O})_2$  (Complex 7).

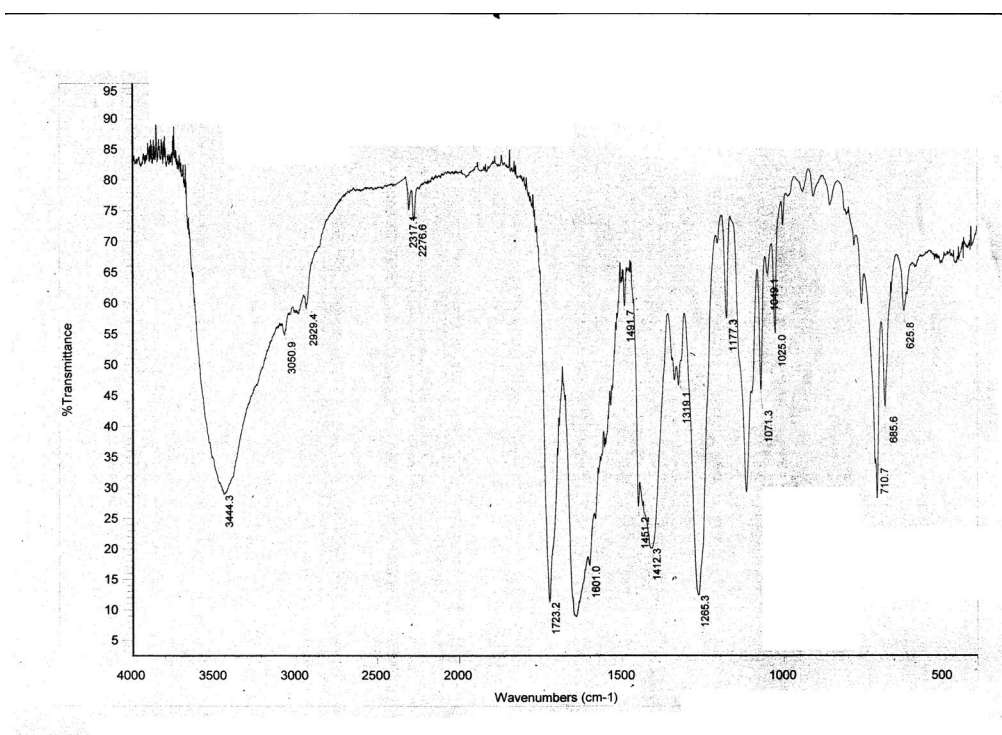

Fig. The IR spectrum of  $[\text{Cu}_2(\text{L}^0)(\text{L}^8)(\text{OAc})(\text{H}_2\text{O})_2] \cdot 1.5\text{MeCN}$  (Complex 8).

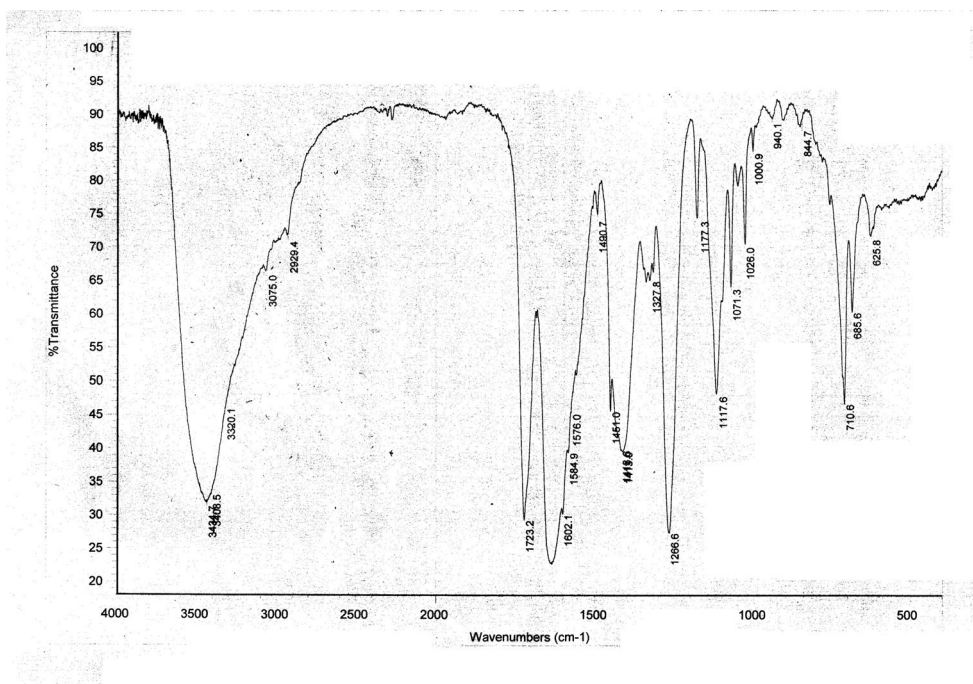

Fig. The IR spectrum of  $[\text{Cu}_2(\text{L}^0)(\text{L}^9)(\text{OAc})(\text{H}_2\text{O})_2] \cdot 1.5\text{MeCN}$  (Complex 9).

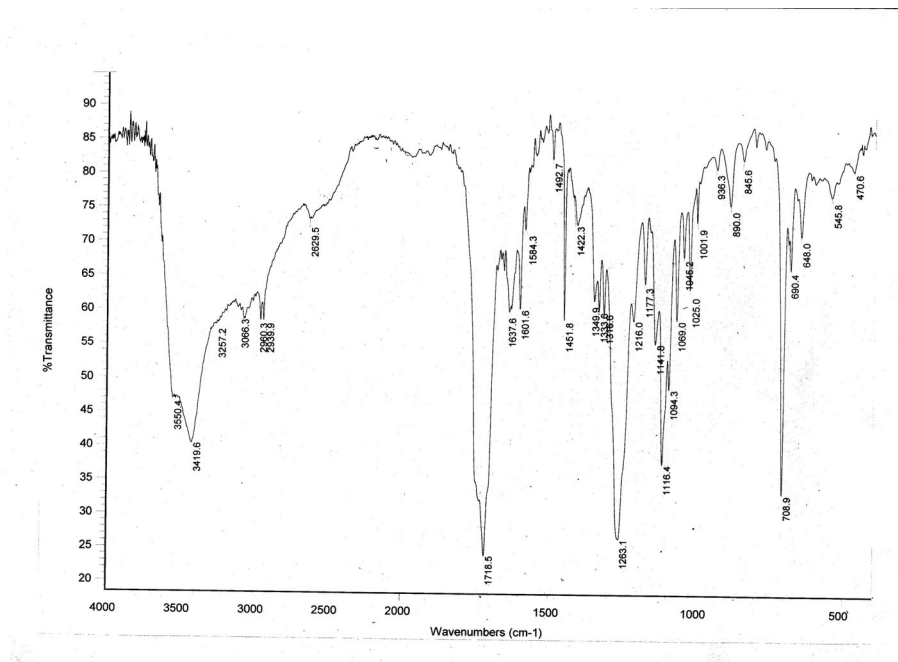

Fig. The IR spectrum of DBTA.



## 5. The UV-vis spectra of the solid complexes

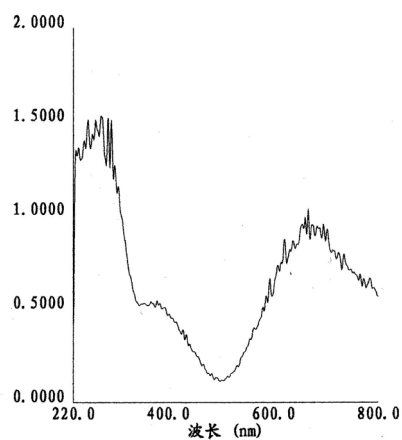

Fig. The UV-vis spectrum of  $[\text{Cu}_2(\text{L}^0)(\text{L}^1)(\text{OAc})(\text{H}_2\text{O})_2] \cdot 1.5\text{MeCN}$  (Complex 1).

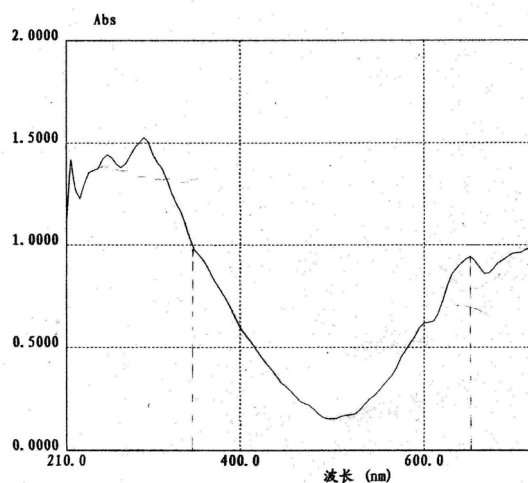

Fig. The UV-vis spectrum of  $\text{Cu}_2(\text{L}^0)(\text{L}^1)(\text{OAc})(\text{H}_2\text{O})_2$  (Complex 10).

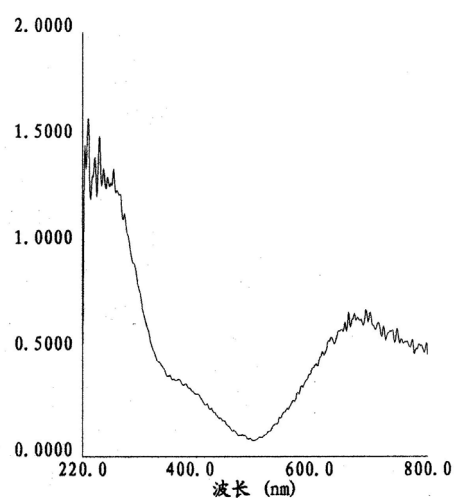

Fig. The UV-vis spectrum of  $[\text{Cu}_2(\text{L}^0)(\text{L}^2)(\text{OAc})(\text{H}_2\text{O})_2] \cdot 1.5\text{MeCN}$  (Complex 2).

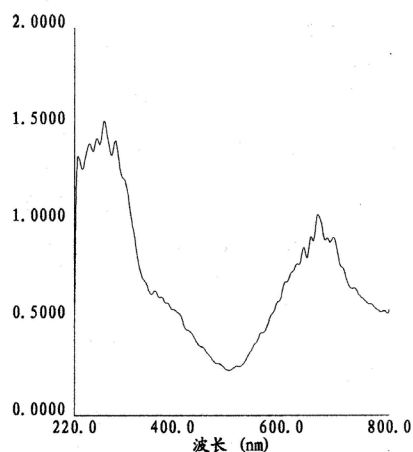

**Fig. The UV-vis spectrum of  $[\text{Cu}_2(\text{L}^0)(\text{L}^3)(\text{OAc})(\text{H}_2\text{O})_2] \cdot 2\text{MeCN}$  (Complex 3).**

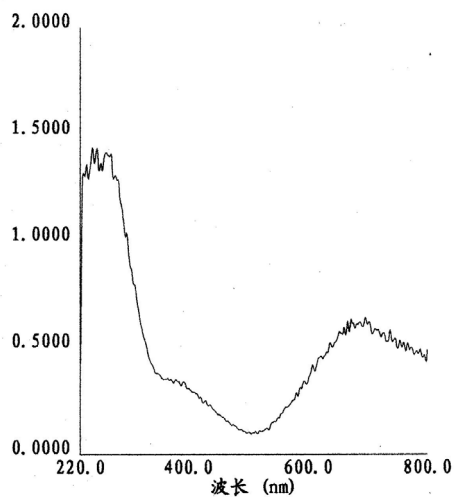

**Fig. The UV-vis spectrum of  $[\text{Cu}_2(\text{L}^0)(\text{L}^4)(\text{OAc})(\text{H}_2\text{O})_2] \cdot 1.5\text{MeCN}$  (Complex 4).**

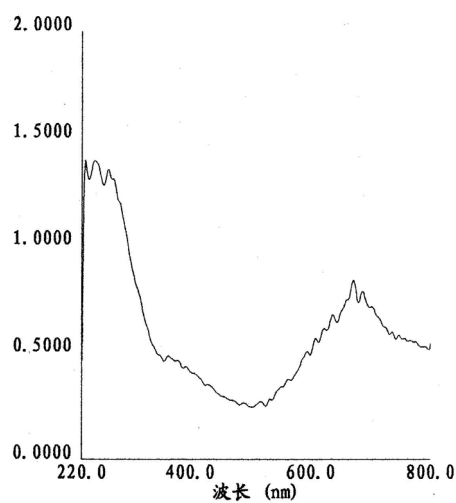

**Fig. The UV-vis spectrum of  $[\text{Cu}_2(\text{L}^0)(\text{L}^5)(\text{OAc})(\text{H}_2\text{O})_2] \cdot 1.5\text{MeCN}$  (Complex 5).**

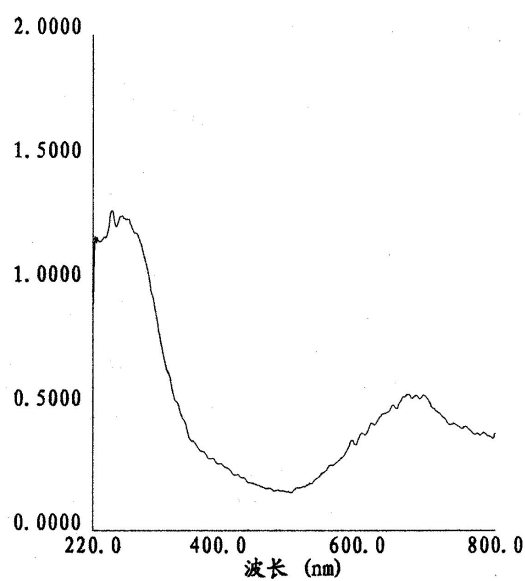

**Fig. The UV-vis spectrum of  $\text{Cu}(\text{HL}^0)(\text{L}^6)(\text{H}_2\text{O})_{1.5}$  (Complex 6).**

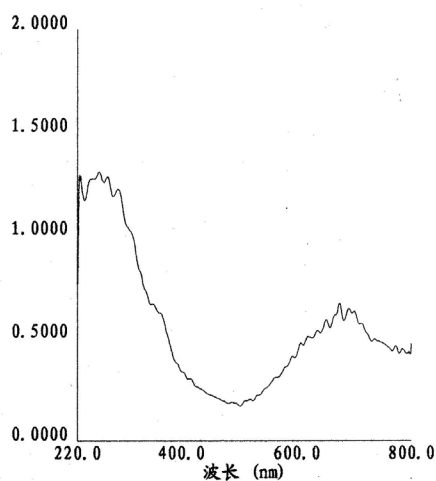

**Fig. The UV-vis spectrum of  $\text{Cu}_2(\text{L}^0)(\text{L}^7)(\text{OAc})(\text{H}_2\text{O})_2$  (Complex 7).**

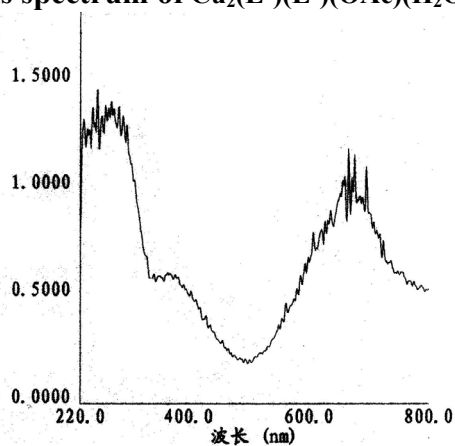

**Fig. The UV-vis spectrum of  $[\text{Cu}_2(\text{L}^0)(\text{L}^8)(\text{OAc})(\text{H}_2\text{O})_2] \cdot 1.5\text{MeCN}$  (Complex 8).**

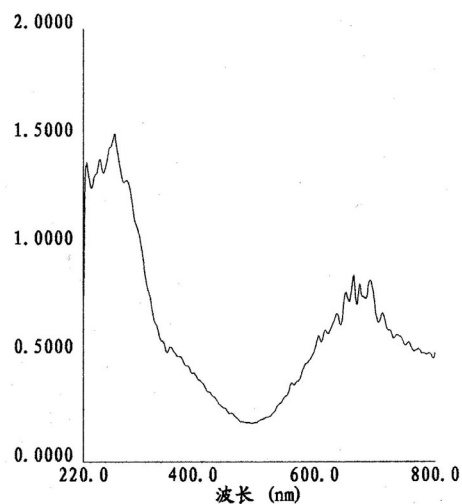

Fig. The UV-vis spectrum of  $[\text{Cu}_2(\text{L}^0)(\text{L}^9)(\text{OAc})(\text{H}_2\text{O})_2] \cdot 1.5\text{MeCN}$  (Complex 9).

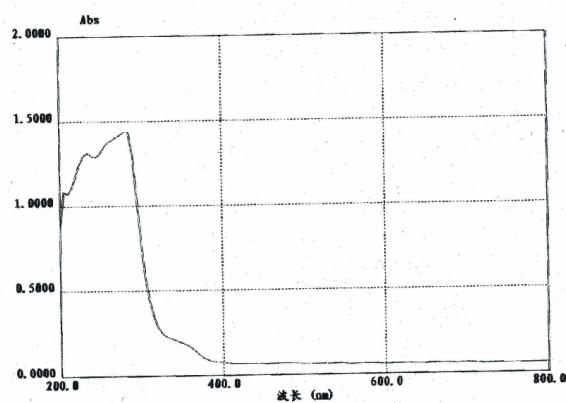

Fig. The UV-vis spectrum of DBTA.

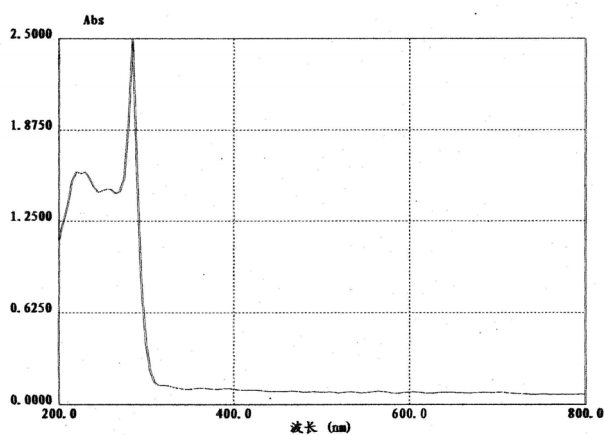

Fig. The UV-vis spectrum of  $\text{HL}^1$ .

## 6. TGA chart

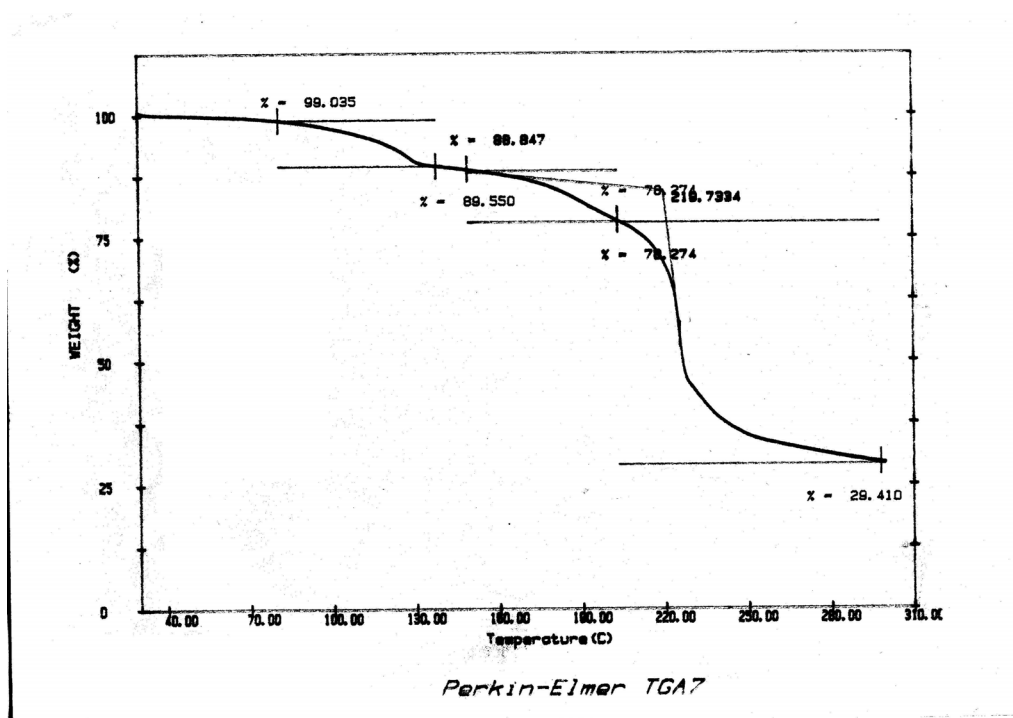

Fig. The thermogram of  $[\text{Cu}_2(\text{L}^0)(\text{L}^1)(\text{OAc})(\text{H}_2\text{O})_2] \cdot 1.5\text{MeCN}$  (Complex 1).

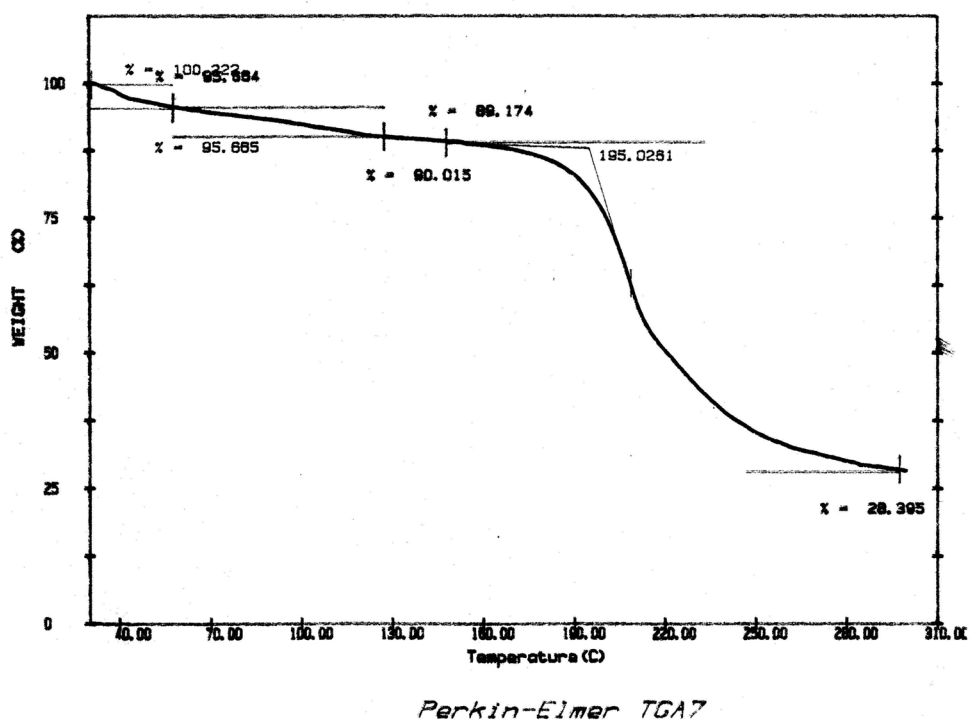

Fig. The thermogram of  $\text{Cu}_2(\text{L}^0)(\text{L}^1)(\text{OAc})(\text{H}_2\text{O})_2$  (Complex 10).

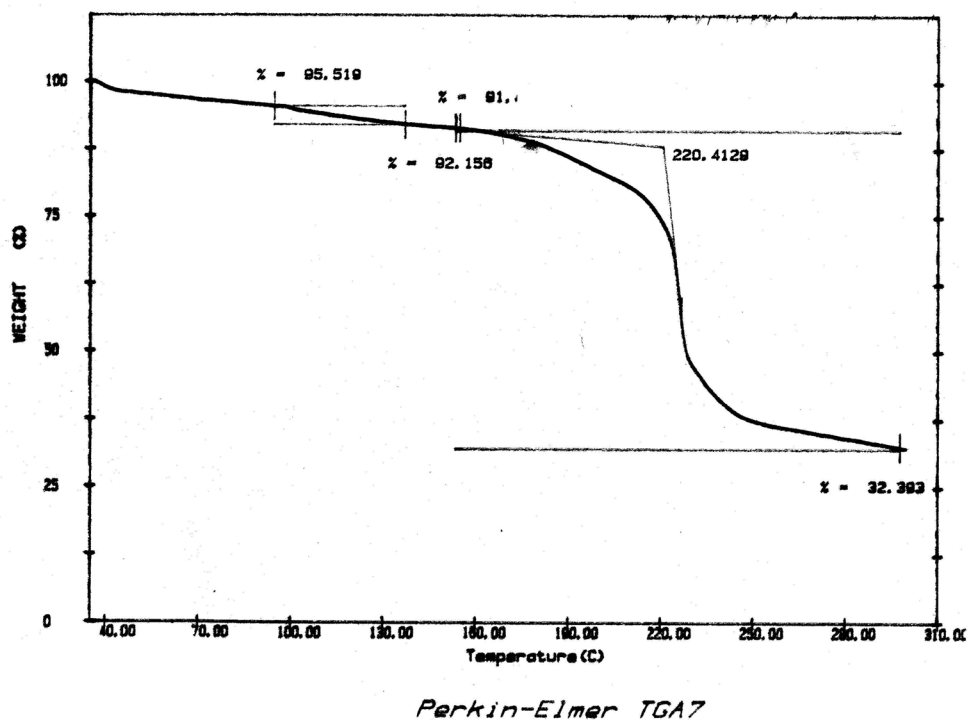

Fig. The thermogram of the solid complex 1 (dried in vacuum for five hours at 50°C).

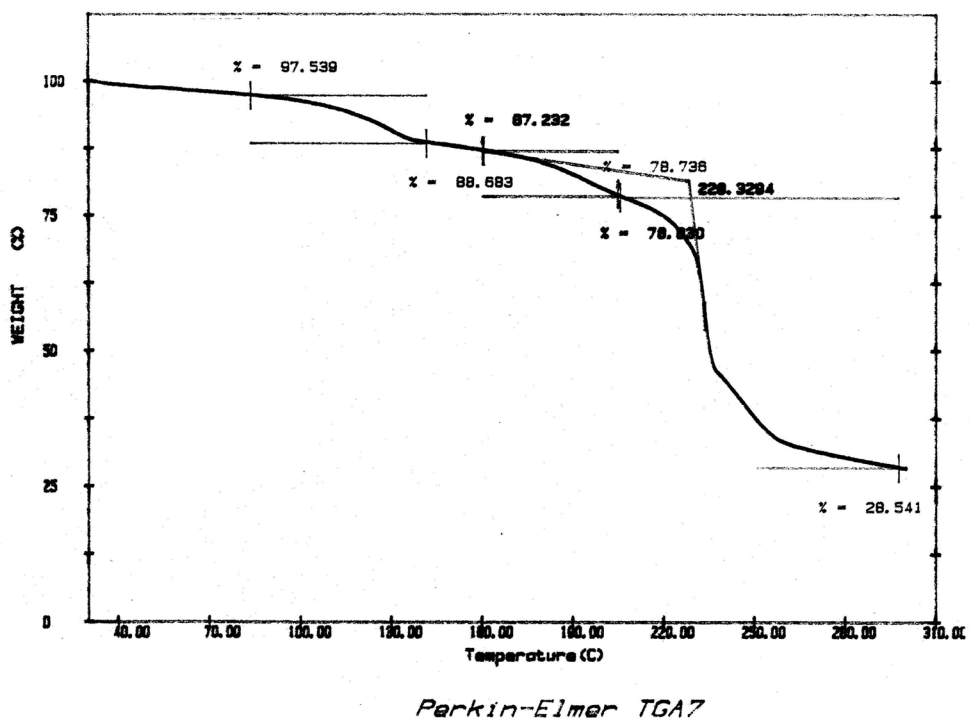

Fig. The thermogram of  $[\text{Cu}_2(\text{L}^0)(\text{L}^2)(\text{OAc})(\text{H}_2\text{O})_2] \cdot 1.5\text{MeCN}$  (Complex 2).

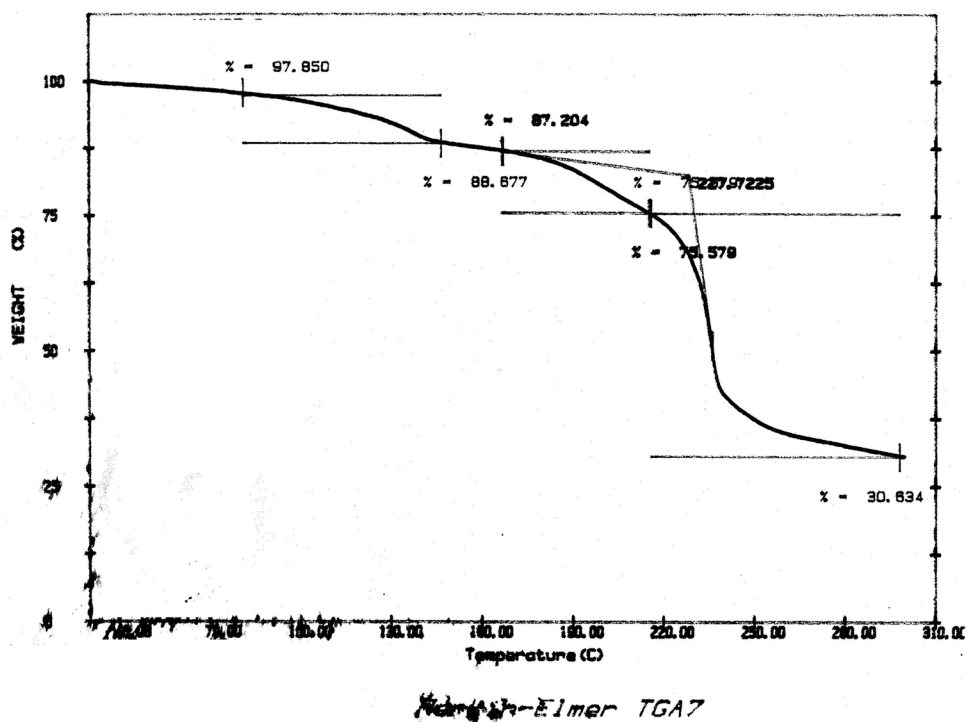

Fig. The thermogram of  $[\text{Cu}_2(\text{L}^0)(\text{L}^3)(\text{OAc})(\text{H}_2\text{O})_2] \cdot 2\text{MeCN}$  (Complex 3).

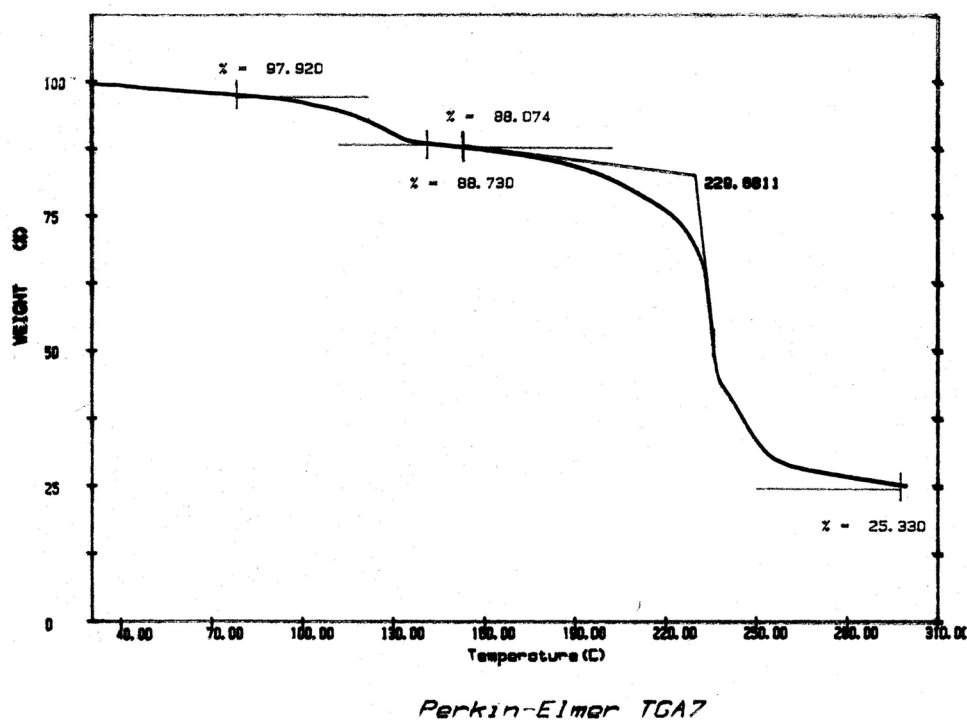

Fig. The thermogram of  $[\text{Cu}_2(\text{L}^0)(\text{L}^4)(\text{OAc})(\text{H}_2\text{O})_2] \cdot 1.5\text{MeCN}$  (Complex 4).

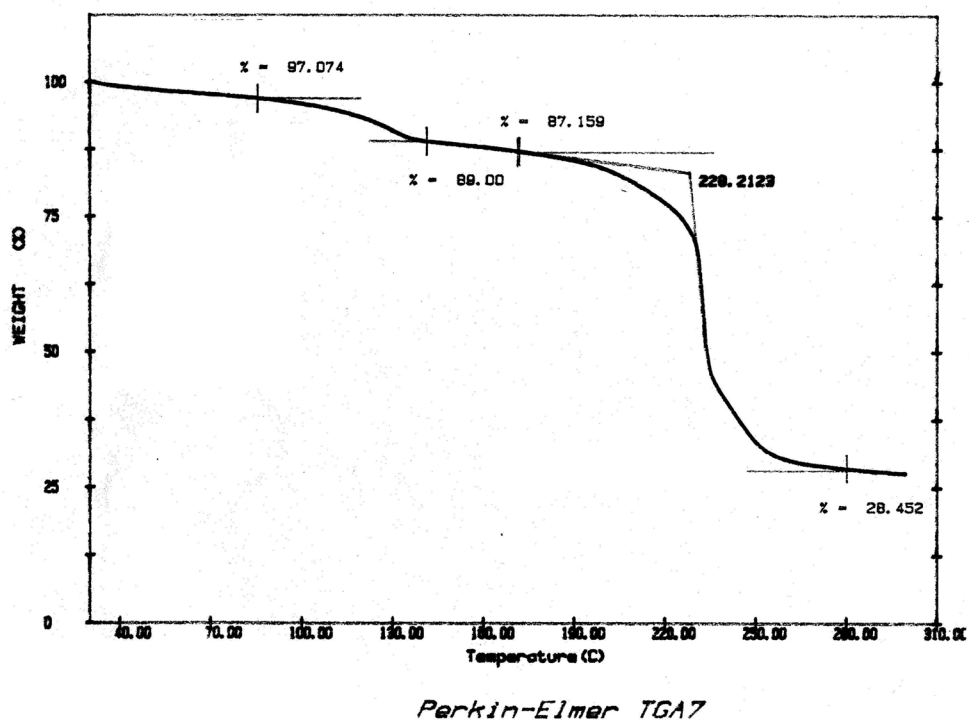

Fig. The thermogram of  $[\text{Cu}_2(\text{L}^0)(\text{L}^5)(\text{OAc})(\text{H}_2\text{O})_2] \cdot 1.5\text{MeCN}$  (Complex 5).

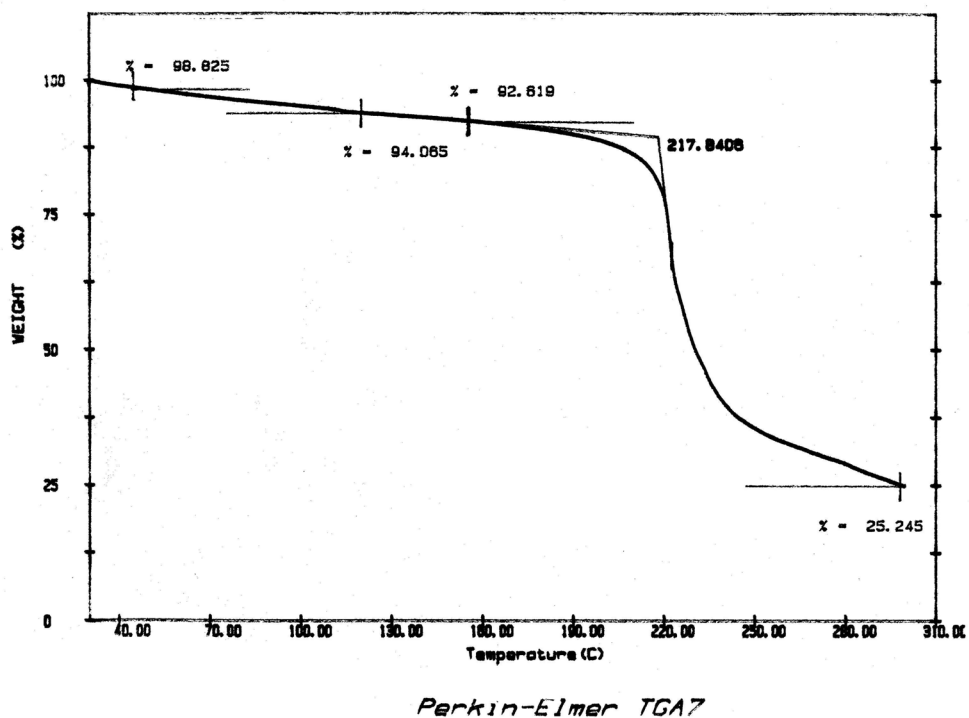

Fig. The thermogram of  $\text{Cu}(\text{HL}^0)(\text{L}^6)(\text{H}_2\text{O})_{1.5}$  (Complex 6).



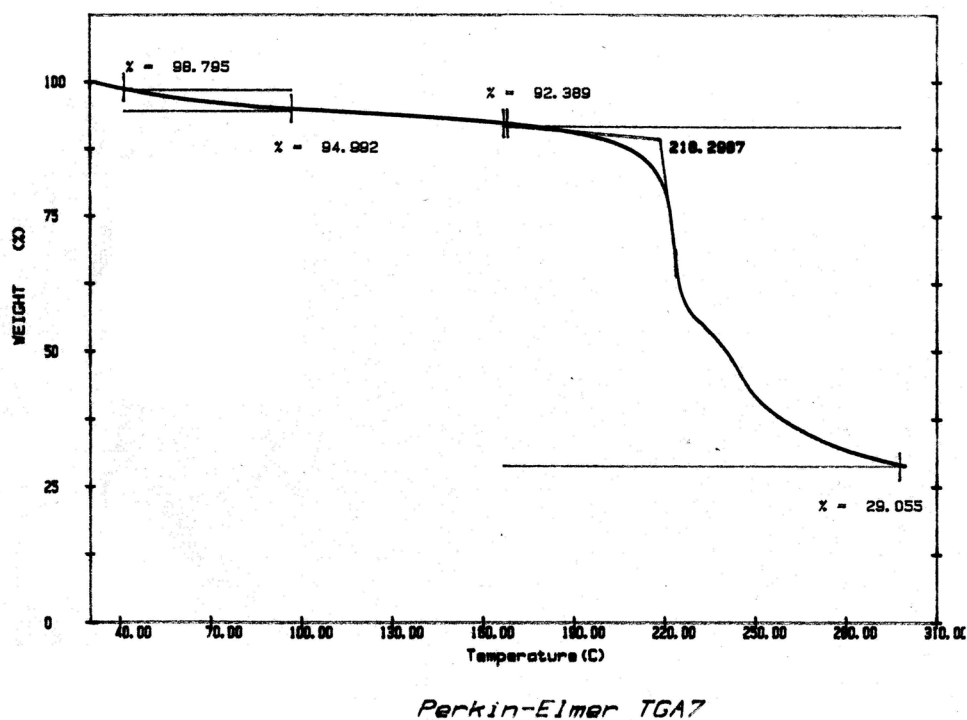

Fig. The thermogram of  $\text{Cu}_2(\text{L}^0)(\text{L}^7)(\text{OAc})(\text{H}_2\text{O})_2$  (Complex 7).

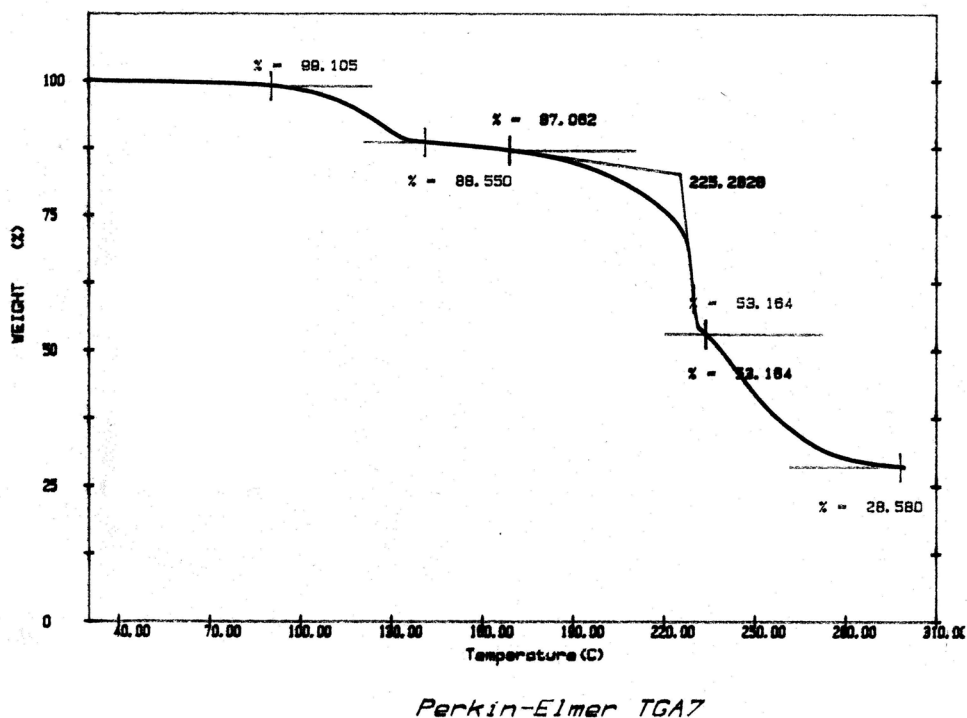

Fig. The thermogram of  $[\text{Cu}_2(\text{L}^0)(\text{L}^8)(\text{OAc})(\text{H}_2\text{O})_2] \cdot 1.5\text{MeCN}$  (Complex 8).

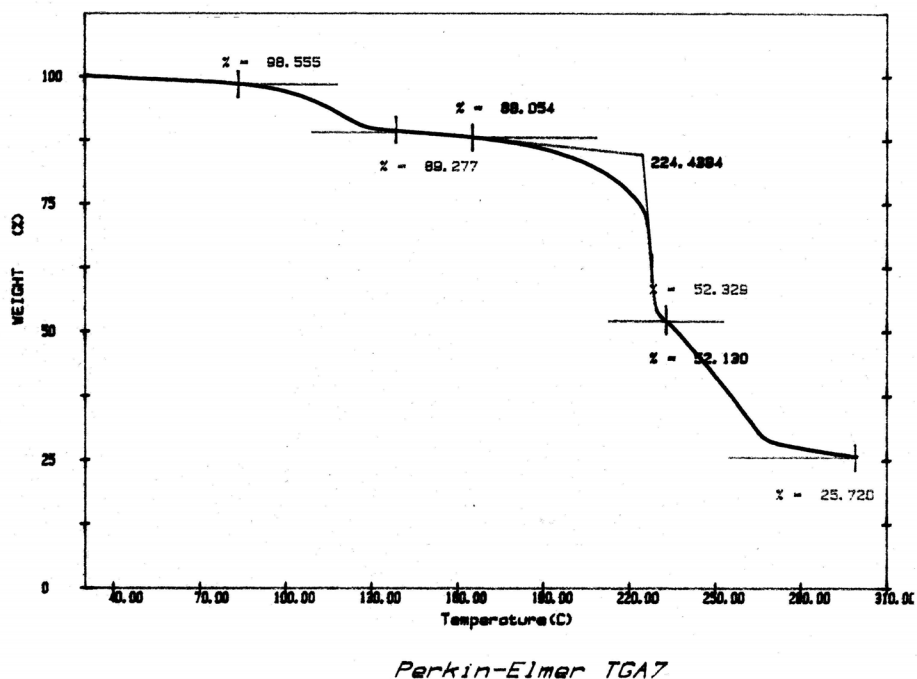

Fig. The thermogram of  $[\text{Cu}_2(\text{L}^0)(\text{L}^9)(\text{OAc})(\text{H}_2\text{O})_2] \cdot 1.5\text{MeCN}$  (Complex 9).

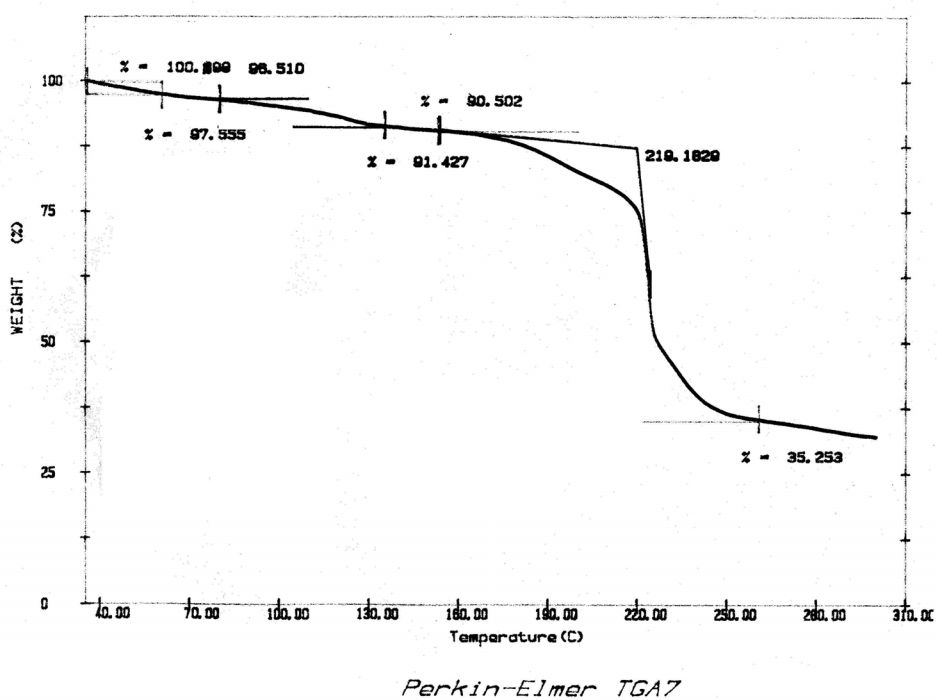

Fig. The thermogram of the complex (obtained from reaction of  $(R)\text{-HL}^1$  with 93.6% ee,  $D\text{-DBTA} \cdot \text{H}_2\text{O}$  and  $\text{Cu}(\text{OAc})_2 \cdot \text{H}_2\text{O}$  (1:1:2 molar ratio) in acetonitrile).

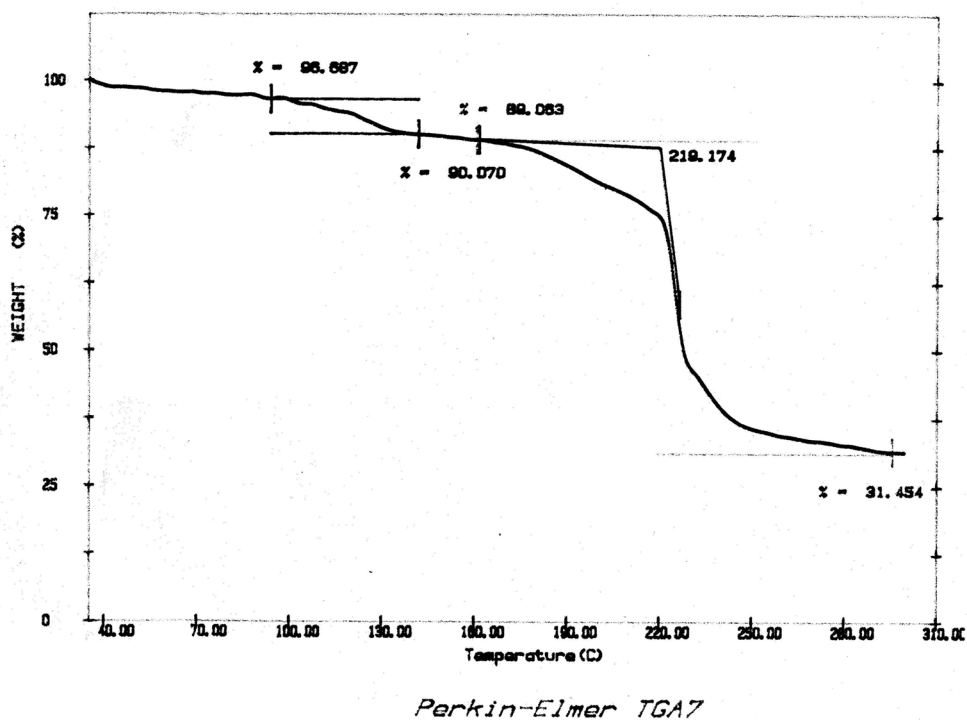

Fig. The thermogram of the complex (obtained from reaction of (*R*)-HL<sup>1</sup> with 93.6% ee, *L*-DBTA·H<sub>2</sub>O and Cu(OAc)<sub>2</sub>·H<sub>2</sub>O (1:1:2 molar ratio) in acetonitrile).

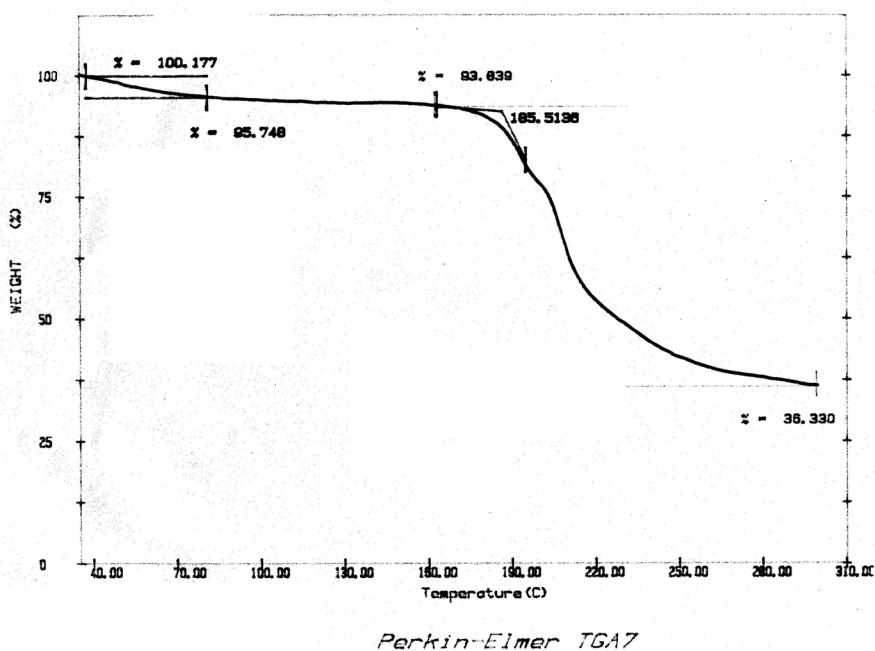

Fig. The thermogram of the complex (obtained from the reaction of (*R*)-HL<sup>1</sup> with 93.3% ee, *D*-DBTA·H<sub>2</sub>O and Cu(OAc)<sub>2</sub>·H<sub>2</sub>O (1:1:2 molar ratio) in EtOH/H<sub>2</sub>O (v/v, 3:1)).

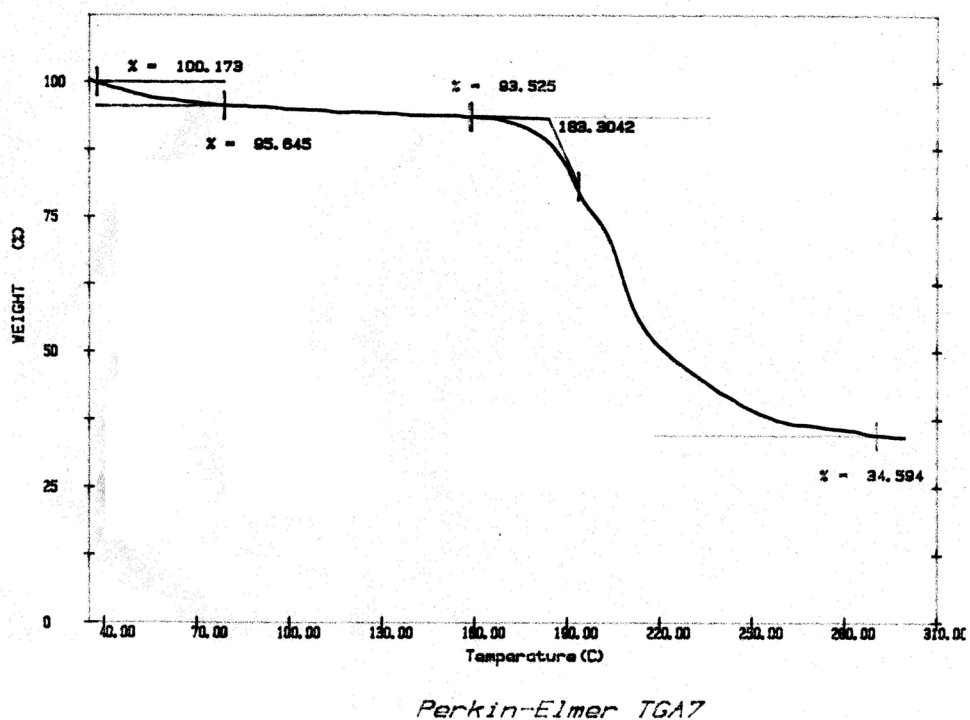

**Fig.** The thermogram of the complex (obtained from the reaction of (*R*)-HL<sup>1</sup> with 93.3% ee, *L*-DBTA·H<sub>2</sub>O and Cu(OAc)<sub>2</sub>·H<sub>2</sub>O (1:1:2 molar ratio) in EtOH/H<sub>2</sub>O (v/v, 3:1).
